# Supplementary material for: Mean age from observations in the lowermost stratosphere: an improved method and interhemispheric differences
Source: Copernicus journal article supplement (doi:10.5194/egusphere-2022-1197), 2022-11-11
Supplement: Supplementary file [file egusphere-2022-1197-AC3-supplement.pdf]

## Reply to RC3

### Manuscript information:

- Title: Mean age from observations in the lowermost stratosphere: an improved method and interhemispheric differences
- Author(s): Thomas Wagenhäuser, Markus Jesswein, Timo Keber, Tanja Schuck, and Andreas Engel
- MS No.: egosphere-2022-1197
- MS type: Research article
- Iteration: Final response

We would like to thank the reviewer for the kind words and the constructive comments. In the following document, the reviewers' comments are marked in *italic font* and indented, our answers are in regular font. Changes in the manuscript are marked-up in red and listed as framed screenshots below the respective comment. The line numbers in our listed changes refer to the marked-up version of the revised manuscript, that is provided separately.

### Point-by-Point reply

#### 1. Line 25. ... *isentrope*, **and** *approximates*

Done.

25 The lowermost stratosphere (LMS) is the lowest part of the extra tropical (exTR) stratosphere. Its upper boundary usually is defined as the 380 K isentrope, ~~which and~~ approximates the lower boundary of the stratosphere in the tropics. The chemical

#### 2. Line 39. ... *made contact with*

Done.

40 infinitesimal fluid elements enter the stratosphere across a source region. The transit time (or "age") of each individual fluid element is the elapsed time since it last made contact ~~to with~~ a source region. A macroscopic air parcel in the stratosphere consists of an infinite number of such fluid elements, each with its own transit time. The transit time distribution for the air

#### 3. Line 48. *making fewer assumptions compared to deriving age spectra.*

Done.

45 studies to derive the mean age of air from observations (e.g. Engel et al., 2017; Leedham Elvidge et al., 2018). Age of air from observations provides a stringent test for numerical models. The number of available trace gas observations that are suited to derive mean age is vastly higher than that to derive age spectra. In addition, deriving mean age relies on making ~~less-fewer~~ assumptions ~~than does compared to~~ deriving age spectra. This makes mean age a valuable measure to

#### 4. Line 51. ... *measurements, an infinite lifetime is commonly assumed.*

Done.

50 depending on the trace gas used, which significantly add to the uncertainty in mean age across large areas of the stratosphere. For example, in order to derive mean age from SF<sub>6</sub> measurements, ~~commonly~~ an infinite lifetime is commonly assumed. In

5. Line 308. Our findings indicate that... (no comma needed after 'indicate')

Done.

315 Our findings indicate that on the one hand, during ST1 old air from higher altitudes descends in a confined way at high latitudes. There is a sharp vortex edge with a strong gradient in the SH. On the other hand, during PGS2 descending old air is

6. Lines 313, 385, 390, 420: 'extend' should be 'extent'.

Done.

310 mixed vertically and horizontally with young air in the LMS. The vortex edge is less sharp than during ST1, resulting in younger air at high latitudes and altitudes and older air outside the PGS2 vortex region compared to ST1.¶  
These results cover only isolated time periods of less than two months for each campaign. In addition, as discussed by Jesswein et al. (2021) the extent of the respective polar vortices and therefore also the location of the respective vortex edge

380 The contribution of the individual parameters (i)-(v) is shown in Fig. 6. Each row depicts isolated sensitivities to uncertainties in a single parameter with all other parameters being held at their best estimate. This allows us to test the relative importance of the individual parameters to the exTR-TR method's overall sensitivity. Most strikingly, uncertainties in the ratio of moments (parameter (v)) seem to contribute only to a negligible extent to the overall sensitivity (panels (m),

390 in the ratio of moments (parameter (v)) seem to contribute only to a negligible extent to the overall sensitivity (panels (m), (n), (o)). Measurement uncertainties in the stratospheric mixing ratio  $\chi(\mathbf{x})$  contribute evenly distributed to the overall sensitivity to a moderate extent (panels (j), (k), (l)). Due to the slightly worse measurement precision during

420 TR method instead, the number and extent of negative mean age values is reduced. Maximum absolute differences between
